# Supplementary material for: Degenerative Suspensory Ligament Desmitis (DSLD) in Peruvian Paso Horses Is Characterized by Altered Expression of TGFβ Signaling Components in Adipose-Derived Stromal Fibroblasts
Source: PubMed Central journal article supplement (PMC5130251; doi:10.1371/journal.pone.0167069), 2016-11-30
Supplement: pone.0167069.s003.pdf [file pone.0167069.s003.pdf]

**Table S1: Details of Horses used in this study**

| <b>Non Affected Peruvian Pintos</b>   | <b>Horse #</b> | <b>Breed</b>    | <b>Sex</b> | <b>Age (years)</b> | <b>Assay</b>           |
|---------------------------------------|----------------|-----------------|------------|--------------------|------------------------|
|                                       | 1              | Peruvian Paso   | Gelding    | 19                 | ADSC                   |
|                                       | 2              | Peruvian Paso   | Stallion   | 18                 | ADSC                   |
|                                       | 3              | Peruvian Paso   | Gelding    | 18                 | ADSC; Frozen-ADSC;     |
|                                       | 4              | Peruvian Paso   | Mare       | 26                 | ADSC; SLT              |
|                                       | 5              | Peruvian Paso   | Mare       | 14                 | Frozen-ADSC; ADSC; SLT |
| <b>DSLID Affected Peruvian Pintos</b> |                |                 |            |                    |                        |
|                                       | 6              | Peruvian Paso   | Gelding    | 18                 | ADSC; Frozen-ADSC;SLT  |
|                                       | 7              | Peruvian Paso   | Gelding    | 9                  | ADSC                   |
|                                       | 8              | Peruvian Paso   | Gelding    | 5                  | ADSC                   |
|                                       | 9              | Peruvian Paso   | Mare       | 14                 | ADSC; Frozen-ADSC;     |
|                                       | 10             | Peruvian Paso   | Mare       | 12                 | ADSC                   |
|                                       | 11             | Peruvian Paso   | Mare       | 8                  | ADSC                   |
|                                       | 12             | Peruvian Paso   | Mare       | 15                 | SLT                    |
|                                       | 13             | Peruvian Paso   | Mare       | 13                 | SLT                    |
|                                       | 14             | Peruvian Paso   | Mare       | 21                 | SLT                    |
| <b>Normal horses</b>                  |                |                 |            |                    |                        |
|                                       | 15             | Arabian         | Gelding    | 31                 | SLT                    |
|                                       | 16             | Arabian         | Gelding    | 19                 | SLT                    |
|                                       | 17             | Appaloosa       | Gelding    | 11                 | SLT                    |
|                                       | 18             | Thoroughbred    | Mare       | 26                 | SLT                    |
|                                       | 19             | Thoroughbred    | Mare       | 25                 | SLT                    |
|                                       | 20             | Irish warmblood | Mare       | 8                  | SLT                    |
