# Supplementary material for: Degenerative Suspensory Ligament Desmitis (DSLD) in Peruvian Paso Horses Is Characterized by Altered Expression of TGFβ Signaling Components in Adipose-Derived Stromal Fibroblasts
Source: PubMed Central journal article supplement (PMC5130251; doi:10.1371/journal.pone.0167069), 2016-11-30
Supplement: pone.0167069.s004.pdf [file pone.0167069.s004.pdf]

**Table S2: Custom QPCR array for equine TGFb1-signaling target genes**

**Signal Transduction:**

*ACLY, ACVRL1, ATF4, BACH1, BHLHE40, BRD2, CREBBP, E2F4, ENG, EP300, FOS, GLI2, GTF2I, HEY1, HSP90AA1, ID1, ID2, ID3, MBD1, ME2, NFIB, NOTCH1, RBL1, RUNX1, RYBP, SMAD1, SMAD3, SMAD5, SMAD6, SNAI1, SP1, SREBF2, STC2, TGFB2, TGFBR2,*

**Cell Migration and Differentiation:**

*ACTA2, ACVR1, AR, ATF3, CDC6, CDKN1B, EMP1, EPHB2, FNI, FURIN, HES1, HMOX1, IFRD1, MAPK14, MMP2, MYC, PAI-1, PDGFA, PPARA, PTGS2, PTHLH, PTK2, PTK2B, THBS1, VEGFA*

**Apoptosis**

*BCL2L1, BDNF, CEBPB, CREB1, CRYAB, CTNNB1, GADD45B, HERPUD1, HMOX1, KLF10, MAP3K7, MAPK8, MSX2, NFKBIA, RAD21, RHOA, RHOB, TNFSF10*
