# Supplementary material for: Degenerative Suspensory Ligament Desmitis (DSLD) in Peruvian Paso Horses Is Characterized by Altered Expression of TGFβ Signaling Components in Adipose-Derived Stromal Fibroblasts
Source: PubMed Central journal article supplement (PMC5130251; doi:10.1371/journal.pone.0167069), 2016-11-30
Supplement: pone.0167069.s006.pdf [file pone.0167069.s006.pdf]

**Table S4: Effect of cell storage on transcript abundance of TGFb-signaling target genes in ADSC cultures**

| Genes                     | Fold difference ( Stored cells :Primary cells) |                             |
|---------------------------|------------------------------------------------|-----------------------------|
|                           | DSL D Paso<br>24h <sup>1</sup>                 | NA Paso<br>24h <sup>1</sup> |
| <i>PTK2B</i> <sup>4</sup> | 1.42                                           | -1.68                       |
| <i>ATF3</i>               | 2.36                                           | -2.11                       |
| <i>MAPK14</i>             | -1.49                                          | -2.17                       |
| <i>ME2</i>                | 2.39                                           | -1.39                       |
| <i>ACVRL1</i>             | 2.07                                           | 1.36                        |
| <i>NFIB</i>               | 1.48                                           | -1.89                       |
| <i>EPHB2</i>              | 1.37                                           | -2.13                       |
| <i>HMOX1</i>              | -1.42                                          | -3.92                       |
| <i>SMAD6</i>              | 1.48                                           | 1.06                        |
| <i>FOS</i>                | -1.43                                          | -3.66                       |
| <i>GLI2</i>               | 1.17                                           | -1.12                       |
| <i>STC2</i>               | 2.02                                           | -3.62                       |
| <i>ID2</i>                | -1.06                                          | -1.56                       |
| <i>PPARA</i>              | 1.67                                           | 1.18                        |
| <i>ENG</i>                | 1.34                                           | -1.76                       |
| <i>CREBBP</i>             | 1.21                                           | -1.40                       |
| <i>NFKBIA</i>             | -1.04                                          | -2.05                       |
| <i>BRD2</i>               | 1.60                                           | -1.36                       |
| <i>TGFBR2</i>             | -1.15                                          | -1.31                       |
| <i>MMP2</i>               | -1.24                                          | -2.68                       |
| <i>CDKN1B</i>             | 1.45                                           | -1.51                       |
| <i>EP300</i>              | 1.23                                           | -1.52                       |
| <i>FURIN</i>              | -1.36                                          | -2.41                       |
| <i>MBD1</i>               | 2.16                                           | 1.11                        |
| <i>IFRD1</i>              | 1.22                                           | -1.73                       |
| <i>SMAD3</i>              | 1.02                                           | 1.06                        |
| <i>BCL2L1</i>             | 1.40                                           | -1.54                       |
| <i>MAPK8</i>              | 1.07                                           | -1.36                       |
| <i>SMAD1</i>              | 1.17                                           | -1.15                       |
| <i>RHOA</i>               | 1.88                                           | -1.01                       |
| <i>BACH1</i>              | 1.10                                           | -1.56                       |
| <i>MYC</i>                | 1.12                                           | -1.43                       |
| <i>PAI-1</i>              | 2.58                                           | 1.24                        |
| <i>ID3</i>                | 1.23                                           | 1.01                        |
| <i>SNAI1</i>              | -1.23                                          | -1.34                       |

<sup>1</sup>Fold difference in transcript abundance in stored cells vs primary cultures. (see Methods section on isolation and storage of adipose-derived stromal fibroblasts (ADSCs) for details). Mean transcript abundance in stored cells was calculated from triplicate cultures of 2 DSLD-Paso and 2 NA-Paso horses (see Table S1 for animal details). <sup>4</sup>Genes are listed in the same order as in Table 1.
