# Supplementary material for: Degenerative Suspensory Ligament Desmitis (DSLD) in Peruvian Paso Horses Is Characterized by Altered Expression of TGFβ Signaling Components in Adipose-Derived Stromal Fibroblasts
Source: PubMed Central journal article supplement (PMC5130251; doi:10.1371/journal.pone.0167069), 2016-11-30
Supplement: pone.0167069.s007.pdf [file pone.0167069.s007.pdf]

**Table S5** Expression of chromatin-modifying enzymes in ligaments

| Gene Group <sup>1</sup> |                | Abundance <sup>2</sup> |                      |        |                     |
|-------------------------|----------------|------------------------|----------------------|--------|---------------------|
|                         |                | DSL D Paso             |                      | NAPaso |                     |
| <b>DHD</b>              | <i>KDM1A</i>   | 42.63                  | (20.43) <sup>2</sup> | 35.25  | (4.93) <sup>2</sup> |
|                         |                |                        |                      |        |                     |
| <b>DM</b>               | <i>DNMT1</i>   | 5.46                   | (3.46)               | 5.87   | (1.92)              |
|                         | <i>DNMT3B</i>  | 1.44                   | (0.84)               | 0.9    | (0.15)              |
| <b>HA</b>               | <i>ATF2</i>    | 43.28                  | (15.69)              | 28.8   | (9.53)              |
|                         | <i>CSRP2BP</i> | 3.98                   | (2.02)               | 4.84   | (2.49)              |
|                         | <i>ESCO2</i>   | 10.78                  | (3.94)               | 7.99   | (2.89)              |
|                         | <i>HAT1</i>    | 26.46                  | (12.42)              | 28.31  | (4.43)              |
|                         | <i>KAT2A</i>   | 14.04                  | (7.59)               | 10.08  | (2.76)              |
|                         | <i>KAT2B</i>   | 95.02                  | (29.70)              | 70.75  | (11.19)             |
|                         | <i>KAT7</i>    | 28.18                  | (9.18)               | 21.7   | (6.67)              |
| <b>HD</b>               | <i>HDAC1</i>   | 45.90                  | (15.28)              | 47.47  | (34.21)             |
|                         | <i>HDAC11</i>  | 5.83                   | (3.18)               | 5.71   | (0.58)              |
|                         | <i>HDAC2</i>   | 50.67                  | (27.94)              | 37.9   | (13.76)             |
|                         | <i>HDAC3</i>   | 15.31                  | (4.59)               | 12.89  | (3.72)              |
|                         | <i>HDAC6</i>   | 8.54                   | (2.30)               | 8.99   | (2.77)              |
| <b>HM</b>               | <i>AURKA</i>   | 4.86                   | (1.52)               | 3.74   | (0.23)              |
|                         | <i>AURKB</i>   | 0.19                   | (0.18)               | 0.12   | (0.08)              |
|                         | <i>CARM1</i>   | 18.81                  | (6.55)               | 19.6   | (3.78)              |
|                         | <i>PRMT1</i>   | 46.38                  | (22.24)              | 53.54  | (5.76)              |
|                         | <i>PRMT3</i>   | 13.93                  | (5.02)               | 15.46  | (2.33)              |
|                         | <i>PRMT5</i>   | 31.70                  | (9.81)               | 29.81  | (2.35)              |
|                         | <i>PRMT6</i>   | 6.93                   | (2.35)               | 5.84   | (1.65)              |
|                         | <i>PRMT7</i>   | 8.19                   | (4.45)               | 5.59   | (1.27)              |
| <i>SUV39H1</i>          | 3.31           | (1.39)                 | 4.7                  | (1.58) |                     |
| <b>HP</b>               | <i>DZIP3</i>   | 26.69                  | (11.92)              | 16.53  | (2.96)              |
|                         | <i>NEK6</i>    | 14.62                  | (5.10)               | 17.37  | (8.04)              |
|                         | <i>PAK1</i>    | 13.55                  | (6.34)               | 12.57  | (2.61)              |
|                         | <i>RNF20</i>   | 30.48                  | (10.37)              | 20.63  | (4.57)              |
| <b>HU</b>               | <i>SETD1A</i>  | 9.52                   | (4.02)               | 8.91   | (3.75)              |
|                         | <i>SETD8</i>   | 19.52                  | (6.82)               | 13.49  | (0.79)              |
|                         | <i>USP16</i>   | 1.57                   | (0.53)               | 0.68   | (0.29)              |
|                         | <i>USP22</i>   | 86.15                  | (40.2)               | 80.77  | (6.11)              |
|                         | <i>WHSC1</i>   | 4.91                   | (1.91)               | 3.63   | (0.98)              |

<sup>1</sup> Gene groupings as defined in Table S3. <sup>2</sup>Mean abundance data (standard deviation) for NA-Pasos (n=9) and DSLD-Pasos (n=9) is provided (see Table S1 for animal details).
