# Supplementary material for: Degenerative Suspensory Ligament Desmitis (DSLD) in Peruvian Paso Horses Is Characterized by Altered Expression of TGFβ Signaling Components in Adipose-Derived Stromal Fibroblasts
Source: PubMed Central journal article supplement (PMC5130251; doi:10.1371/journal.pone.0167069), 2016-11-30
Supplement: pone.0167069.s008.pdf [file pone.0167069.s008.pdf]

**Table S6: Effect of TGFb1 on expression of chromatin-modifying enzymes in ADSCs**

| Gene Group <sup>1</sup> |                | NONE                    |                     |                      |         | +TGFb1                  |         |                      |         |
|-------------------------|----------------|-------------------------|---------------------|----------------------|---------|-------------------------|---------|----------------------|---------|
|                         |                | DSLDD-Paso <sup>2</sup> |                     | NA-Paso <sup>2</sup> |         | DSLDD-Paso <sup>2</sup> |         | NA-Paso <sup>2</sup> |         |
| <b>DHD</b>              | <i>KDM1A</i>   | 30.23                   | (7.60) <sup>3</sup> | 33.85                | (8.13)  | 14.96                   | (0.87)  | 24.64                | (14.71) |
| <b>DM</b>               | <i>DNMT1</i>   | 5.28                    | (1.65)              | 8.05                 | (2.64)  | 4.05                    | (2.96)  | 6.93                 | (5.99)  |
|                         | <i>DNMT3B</i>  | 1.38                    | (0.78)              | 1.46                 | (0.61)  | 0.27                    | (0.03)  | 0.42                 | (0.39)  |
| <b>HA</b>               | <i>ATF2</i>    | 18.66                   | (3.90)              | 22.95                | (4.95)  | 12.16                   | (5.98)  | 12.57                | (6.75)  |
|                         | <i>CSRP2BP</i> | 2.70                    | (0.67)              | 3.05                 | (0.75)  | 1.31                    | (0.19)  | 2.35                 | (1.19)  |
|                         | <i>ESCO1</i>   | 1.68                    | (0.78)              | 1.61                 | (0.70)  | 0.56                    | (0.13)  | 0.60                 | (0.42)  |
|                         | <i>HAT1</i>    | 28.86                   | (6.46)              | 24.37                | (3.87)  | 36.02                   | (3.96)  | 24.18                | (12.26) |
|                         | <i>KAT2A</i>   | 4.98                    | (1.50)              | 5.78                 | (1.75)  | 2.67                    | (0.45)  | 3.74                 | (2.24)  |
|                         | <i>KAT2B</i>   | 28.03                   | (5.15)              | 25.33                | (6.67)  | 5.28                    | (2.33)  | 4.80                 | (2.82)  |
|                         | <i>KAT7</i>    | 13.23                   | (4.24)              | 14.47                | (3.05)  | 5.71                    | (0.79)  | 11.40                | (6.58)  |
| <b>HD</b>               | <i>HDAC1</i>   | 33.98                   | (7.47)              | 39.27                | (10.60) | 18.64                   | (0.87)  | 23.72                | (12.61) |
|                         | <i>HDAC11</i>  | 1.02                    | (0.56)              | 0.62                 | (0.32)  | 0.05                    | (0.02)  | 0.14                 | (0.12)  |
|                         | <i>HDAC2</i>   | 30.94                   | (9.16)              | 28.77                | 97.40)  | 20.40                   | (4.43)  | 24.17                | (11.91) |
|                         | <i>HDAC3</i>   | 19.05                   | (6.38)              | 19.24                | (5.05)  | 6.32                    | (1.16)  | 9.35                 | (5.33)  |
|                         | <i>HDAC6</i>   | 21.21                   | (8.39)              | 19.77                | (3.09)  | 3.94                    | (0.62)  | 8.30                 | (3.43)  |
| <b>HM</b>               | <i>AURKA</i>   | 6.85                    | (1.20)              | 13.80                | (3.04)  | 7.23                    | (3.79)  | 15.44                | (15.43) |
|                         | <i>AURKB</i>   | 3.95                    | (0.95)              | 8.04                 | (2.78)  | 4.80                    | (6.30)  | 8.56                 | (6.69)  |
|                         | <i>CARM1</i>   | 26.01                   | (6.23)              | 31.30                | (8.32)  | 14.62                   | (4.52)  | 18.93                | (11.16) |
|                         | <i>PRMT1</i>   | 49.24                   | (12.12)             | 73.03                | (12.69) | 57.58                   | (13.09) | 79.96                | (50.66) |
|                         | <i>PRMT3</i>   | 14.33                   | (2.76)              | 13.36                | (2.60)  | 12.91                   | (1.81)  | 11.48                | (5.66)  |
|                         | <i>PRMT5</i>   | 13.54                   | (5.32)              | 15.96                | (1.07)  | 14.68                   | (12.18) | 16.89                | (7.15)  |
|                         | <i>PRMT6</i>   | 3.92                    | (1.25)              | 4.54                 | (1.16)  | 2.77                    | (1.25)  | 3.44                 | (1.78)  |
|                         | <i>PRMT7</i>   | 9.76                    | (2.11)              | 9.54                 | (2.13)  | 4.61                    | (0.60)  | 6.88                 | (3.25)  |
| <i>SUV39H1</i>          | 3.46           | (1.20)                  | 5.40                | (0.90)               | 6.49    | (2.93)                  | 9.35    | (4.51)               |         |
| <b>HP</b>               | <i>DZIP3</i>   | 15.67                   | (6.04)              | 13.25                | (3.27)  | 3.67                    | (2.19)  | 5.33                 | (2.35)  |
|                         | <i>NEK6</i>    | 23.74                   | (5.68)              | 21.20                | (4.49)  | 17.34                   | (2.66)  | 24.76                | (16.02) |
|                         | <i>PAK1</i>    | 56.19                   | (10.09)             | 53.22                | (19.76) | 39.73                   | (15.02) | 30.98                | (14.81) |
|                         | <i>RNF20</i>   | 11.05                   | (3.48)              | 9.58                 | (3.06)  | 0.22                    | (0.07)  | 0.29                 | (0.16)  |
| <b>HU</b>               | <i>SETD1A</i>  | 7.71                    | (2.79)              | 10.83                | (3.04)  | 1.54                    | (0.83)  | 3.53                 | (2.75)  |
|                         | <i>SETD8</i>   | 19.47                   | (4.34)              | 18.80                | (2.82)  | 2.40                    | (0.50)  | 4.51                 | (2.40)  |
|                         | <i>USP16</i>   | 0.44                    | (0.20)              | 0.41                 | 90.10)  | 25.47                   | (4.19)  | 46.75                | (28.13) |
|                         | <i>USP22</i>   | 85.68                   | (27.15)             | 82.78                | (18.55) | 3.36                    | (1.17)  | 7.10                 | (5.02)  |
|                         | <i>WHSC1</i>   | 5.30                    | (1.67)              | 7.29                 | (1.09)  | 5.30                    | (1.67)  | 7.10                 | (5.02)  |

<sup>1</sup> Gene groups as described in Table S-3. <sup>2</sup>Values represent the mean of duplicate cultures from DSLDD-Pasos (n= 6 ) and NA Paso Horses n= 6 (see Table 1 for animal details). <sup>3</sup>SD values are in parentheses
